# Supplementary material
Source: Elsevier journal article supplement (https://agroparistech.hal.science/hal-03451358v1/file/mmc3.pdf)

a

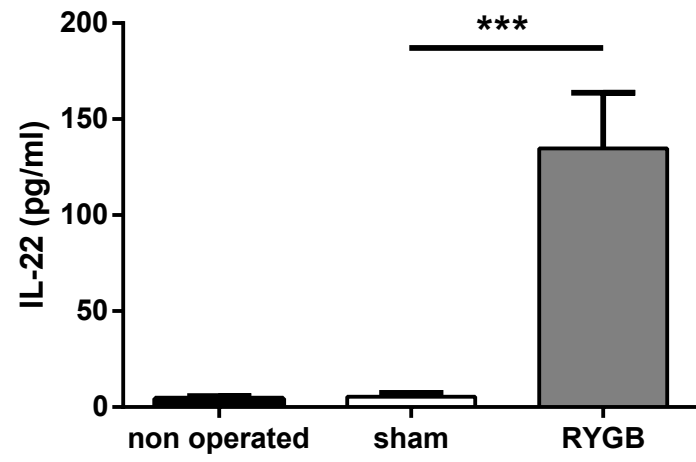

b

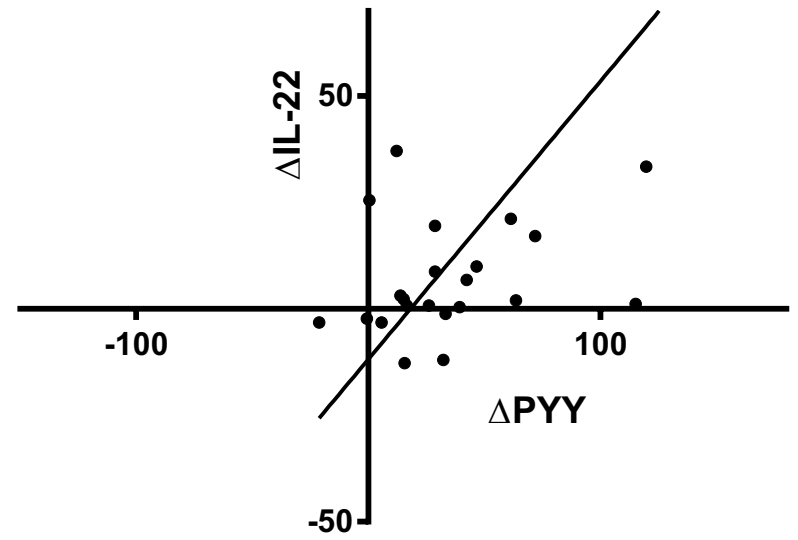

Supplement: mmc3 [file mmc3.pdf]
